# Supplementary material
Source: publisher site journal article supplement (https://www.dovepress.com/article/374805)
Supplement: Supplementary file 1 [file get_supplementary_file.php]

## Supplementary Table 1. Details of *S. pneumoniae*, *H. influenzae* and *M. catarrhalis* strains collected by different hospitals in different regions during different study periods.

| Region | City | Hospital | Year | | | | |  | Count | | |
| --- | --- | --- | --- | --- | --- | --- | --- | --- | --- | --- | --- |
| 2010 | 2013 | 2014 | 2016 | 2018 |  | Spna | Hinb | Bcac |
| East | Hangzhou | Sir Run Run Shaw Hospital affiliated with the Zhejiang University School of Medicine |  |  | 33 |  |  |  | 9 | 19 | 5 |
| East | Hangzhou | The First Affiliated Hospital of Medical School of Zhejiang University | 77 |  | 52 |  |  |  | 76 | 42 | 11 |
| East | Hangzhou | The First Affiliated Hospital of Sun Yat-sen University |  |  |  |  | 28 |  | 1 | 22 | 5 |
| East | Hangzhou | The Second Affiliated Hospital of Medical School of Zhejiang University | 97 | 68 | 68 | 33 |  |  | 124 | 104 | 38 |
| East | Hefei | The First Affiliated Hospital of Anhui Medical University |  |  | 12 |  |  |  | 12 |  |  |
| East | Shanghai | Ruijin Hospital, Shanghai Jiao Tong University School of Medicine | 95 |  |  | 17 |  |  | 47 | 55 | 10 |
| East | Shanghai | Zhongshan Hospital, Fudan University | 74 | 19 | 58 | 57 |  |  | 96 | 98 | 14 |
| Middle | Changsha | Central South University Xiangya Hospital |  |  |  | 14 | 28 |  | 12 | 24 | 6 |
| Middle | Wuhan | Tongji Hospital, Tongji Medical College, Huazhong University of Science & Technology | 59 |  |  |  |  |  | 25 | 24 | 10 |
| Middle | Wuhan | Wuhan Puai Hospital |  |  |  | 28 |  |  | 13 | 14 | 1 |
| Middle | Xian | Xijing Hosital |  | 86 | 89 |  |  |  | 109 | 33 | 33 |
| Middle | Zhengzhou | The First Affiliated Hospital of Zhengzhou University |  |  | 53 |  |  |  | 37 | 7 | 9 |
| North | Beijing | Beijing Chao-Yang Hospital, Capital Medical University | 71 | 94 | 60 |  |  |  | 172 | 39 | 14 |
| North | Beijing | Beijing Hospital of the Ministry of Health | 110 | 65 | 68 |  |  |  | 121 | 92 | 30 |
| North | Beijing | Beijing Tsinghua Chang Gung Memorial Hospital |  |  |  | 21 | 77 |  | 44 | 12 | 42 |
| North | Beijing | Peking Union Medical College Hospital | 98 | 71 | 67 |  |  |  | 130 | 70 | 36 |
| North | Beijing | Peking University People's Hospital |  | 75 | 70 | 71 | 150 |  | 207 | 94 | 65 |
| North | Beijing | Sino-Japanese Friendship Hospital |  |  |  | 18 | 85 |  | 38 | 46 | 19 |
| North | Hohhot | Inner Mongolia Medical University Affiliated Hospital |  |  |  | 46 |  |  | 19 | 16 | 11 |
| North | Jinan | Shandong Provincial Hospital |  |  |  | 61 |  |  | 29 | 23 | 9 |
| North | Tianjin | Tianjin General Hospital |  |  |  | 14 |  |  | 12 | 2 |  |
| Northeast | Changchun | Jilin University Sino-Japanese Friendship Hospital |  |  | 26 | 52 | 17 |  | 56 | 21 | 18 |
| Northeast | Harbin | The First Affiliated Hospital of Harbin Medical University |  |  | 62 |  |  |  | 32 | 20 | 10 |
| Northeast | Shenyang | The First Hospital of China Medical University | 49 | 23 | 26 |  |  |  | 72 | 18 | 8 |
| Northeast | Shenyang | The Second Hospital of China Medical University | 65 |  |  |  |  |  | 39 | 18 | 8 |
| Northwest | Urumchi | The First Affiliated Hospital of Xinjiang Med-ical University |  |  | 35 | 53 |  |  | 77 | 9 | 2 |
| Northwest | Yinchuan | Ningxia Medical University General Hospital |  |  |  | 75 | 119 |  | 81 | 82 | 31 |
| South | Guangzhou | Guangzhou Institute of Respiratory Disease | 94 |  | 79 |  | 6 |  | 89 | 69 | 21 |
| South | Guangzhou | The First Affiliated Hospital of Guangzhou Medical University |  | 54 |  | 23 |  |  | 32 | 25 | 20 |
| South | Nanchang | The First Affiliated Hospital of Nanchang University |  |  | 36 |  |  |  | 18 | 8 | 10 |
| Southwest | Chengdu | West China Hospital of Sichuan University |  |  |  |  | 69 |  | 22 | 45 | 2 |
| Southwest | Chongqing | Southwest Hospital |  | 66 | 113 |  |  |  | 102 | 55 | 22 |
| Southwest | Kunming | First Affiliated Hospital of Kunming Medical University |  | 24 | 39 |  |  |  | 55 | 8 |  |
| Southwest | Nanning | The First Affiliated Hospital of Guangxi Medical University |  |  |  | 8 |  |  | 7 | 1 |  |

aSpn: *S. pneumoniae*

bHin: *H. influenzae*

cBca: *M. catarrhalis*

## Supplementary Table 2. Multi-drug resistance profile of 2015 *S. pneumoniae* isolates.

| Organism | Resistance profile | n | percent |
| --- | --- | --- | --- |
| *S. pneumoniae* | MLS, Sulfonamides, Tetracycline, β-lactams | 651 | 32.30% |
| *S. pneumoniae* | MLS | 244 | 12.10% |
| *S. pneumoniae* | MLS, Sulfonamides, Tetracycline | 218 | 10.80% |
| *S. pneumoniae* | MLS, β-lactams | 211 | 10.50% |
| *S. pneumoniae* | MLS, Tetracycline | 182 | 9.00% |
| *S. pneumoniae* | MLS, Tetracycline, β-lactams | 126 | 6.30% |
| *S. pneumoniae* | All sensitive | 86 | 4.30% |
| *S. pneumoniae* | Amphenicols, MLS, Sulfonamides, Tetracycline | 59 | 2.90% |
| *S. pneumoniae* | Amphenicols, MLS, Tetracycline | 54 | 2.70% |
| *S. pneumoniae* | Amphenicols, MLS, Sulfonamides, Tetracycline, β-lactams | 39 | 1.90% |
| *S. pneumoniae* | Tetracycline | 31 | 1.50% |
| *S. pneumoniae* | MLS, Sulfonamides, β-lactams | 20 | 1.00% |
| *S. pneumoniae* | MLS, Sulfonamides, Tetracycline, Topoisomerase inhibitors, β-lactams | 12 | 0.60% |
| *S. pneumoniae* | Amphenicols, MLS, Tetracycline, β-lactams | 11 | 0.50% |
| *S. pneumoniae* | MLS, Sulfonamides | 8 | 0.40% |
| *S. pneumoniae* | MLS, Topoisomerase inhibitors, β-lactams | 8 | 0.40% |
| *S. pneumoniae* | MLS, Tetracycline, Topoisomerase inhibitors, β-lactams | 6 | 0.30% |
| *S. pneumoniae* | β-lactams | 5 | 0.20% |
| *S. pneumoniae* | Amphenicols, MLS, Sulfonamides | 4 | 0.20% |
| *S. pneumoniae* | Amphenicols, MLS, Sulfonamides, β-lactams | 3 | 0.10% |
| *S. pneumoniae* | Amphenicols, MLS, Tetracycline, Topoisomerase inhibitors | 3 | 0.10% |
| *S. pneumoniae* | Amphenicols, Tetracycline | 3 | 0.10% |
| *S. pneumoniae* | MLS, Tetracycline, Topoisomerase inhibitors | 3 | 0.10% |
| *S. pneumoniae* | MLS, Topoisomerase inhibitors | 3 | 0.10% |
| *S. pneumoniae* | Sulfonamides, Tetracycline | 3 | 0.10% |
| *S. pneumoniae* | Amphenicols | 2 | 0.10% |
| *S. pneumoniae* | Amphenicols, MLS | 2 | 0.10% |
| *S. pneumoniae* | Amphenicols, MLS, Sulfonamides, Tetracycline, Topoisomerase inhibitors | 2 | 0.10% |
| *S. pneumoniae* | Amphenicols, MLS, Sulfonamides, Tetracycline, Topoisomerase inhibitors, β-lactams | 2 | 0.10% |
| *S. pneumoniae* | Amphenicols, Sulfonamides, Tetracycline | 2 | 0.10% |
| *S. pneumoniae* | MLS, Sulfonamides, Tetracycline, Topoisomerase inhibitors | 2 | 0.10% |
| *S. pneumoniae* | Sulfonamides, β-lactams | 2 | 0.10% |
| *S. pneumoniae* | Tetracycline, β-lactams | 2 | 0.10% |
| *S. pneumoniae* | Topoisomerase inhibitors, β-lactams | 2 | 0.10% |
| *S. pneumoniae* | Amphenicols, Tetracycline, β-lactams | 1 | 0.00% |
| *S. pneumoniae* | Sulfonamides | 1 | 0.00% |
| *S. pneumoniae* | Sulfonamides, Tetracycline, β-lactams | 1 | 0.00% |
| *S. pneumoniae* | Topoisomerase inhibitors | 1 | 0.00% |

## Supplementary Table 3. Multi-drug resistance profile of 1215 *H. influenzae* isolates.

| Organism | Resistance profile | n | percent |
| --- | --- | --- | --- |
| *H. influenzae* | All sensitive | 501 | 41.20% |
| *H. influenzae* | Sulfonamides, β-lactams | 213 | 17.50% |
| *H. influenzae* | β-lactams | 197 | 16.20% |
| *H. influenzae* | Sulfonamides | 123 | 10.10% |
| *H. influenzae* | MLS, Sulfonamides, β-lactams | 50 | 4.10% |
| *H. influenzae* | Amphenicols, Sulfonamides, β-lactams | 20 | 1.60% |
| *H. influenzae* | Amphenicols, Sulfonamides, Tetracycline, β-lactams | 17 | 1.40% |
| *H. influenzae* | Sulfonamides, Tetracycline, β-lactams | 17 | 1.40% |
| *H. influenzae* | MLS, β-lactams | 15 | 1.20% |
| *H. influenzae* | MLS, Sulfonamides, Tetracycline, β-lactams | 11 | 0.90% |
| *H. influenzae* | Tetracycline | 10 | 0.80% |
| *H. influenzae* | Tetracycline, β-lactams | 9 | 0.70% |
| *H. influenzae* | Amphenicols, Sulfonamides | 6 | 0.50% |
| *H. influenzae* | MLS | 6 | 0.50% |
| *H. influenzae* | Sulfonamides, Tetracycline | 5 | 0.40% |
| *H. influenzae* | Amphenicols | 4 | 0.30% |
| *H. influenzae* | MLS, Sulfonamides | 3 | 0.20% |
| *H. influenzae* | Amphenicols, MLS, Sulfonamides, Tetracycline, β-lactams | 2 | 0.20% |
| *H. influenzae* | Amphenicols, Tetracycline, β-lactams | 2 | 0.20% |
| *H. influenzae* | MLS, Tetracycline, β-lactams | 2 | 0.20% |
| *H. influenzae* | Amphenicols, β-lactams | 1 | 0.10% |
| *H. influenzae* | MLS, Sulfonamides, Tetracycline | 1 | 0.10% |

## Supplementary Table 4. Multi-drug resistance profile of 520 *H. influenzae* isolates.

| Organism | Resistance profile | n | percent |
| --- | --- | --- | --- |
| *M. catarrhalis* | All sensitive | 362 | 69.60% |
| *M. catarrhalis* | MLS | 51 | 9.80% |
| *M. catarrhalis* | MLS, β-lactams | 32 | 6.20% |
| *M. catarrhalis* | Tetracycline | 21 | 4.00% |
| *M. catarrhalis* | Sulfonamides | 14 | 2.70% |
| *M. catarrhalis* | β-lactams | 7 | 1.30% |
| *M. catarrhalis* | Amphenicols | 6 | 1.20% |
| *M. catarrhalis* | MLS, Tetracycline | 5 | 1.00% |
| *M. catarrhalis* | Tetracycline, β-lactams | 5 | 1.00% |
| *M. catarrhalis* | Amphenicols, Sulfonamides | 4 | 0.80% |
| *M. catarrhalis* | MLS, Sulfonamides, β-lactams | 4 | 0.80% |
| *M. catarrhalis* | MLS, Sulfonamides | 2 | 0.40% |
| *M. catarrhalis* | MLS, Tetracycline, β-lactams | 2 | 0.40% |
| *M. catarrhalis* | Amphenicols, MLS, Tetracycline | 1 | 0.20% |
| *M. catarrhalis* | Amphenicols, Tetracycline | 1 | 0.20% |
| *M. catarrhalis* | Amphenicols, Tetracycline, β-lactams | 1 | 0.20% |
| *M. catarrhalis* | Sulfonamides, Tetracycline | 1 | 0.20% |
| *M. catarrhalis* | Sulfonamides, Tetracycline, β-lactams | 1 | 0.20% |


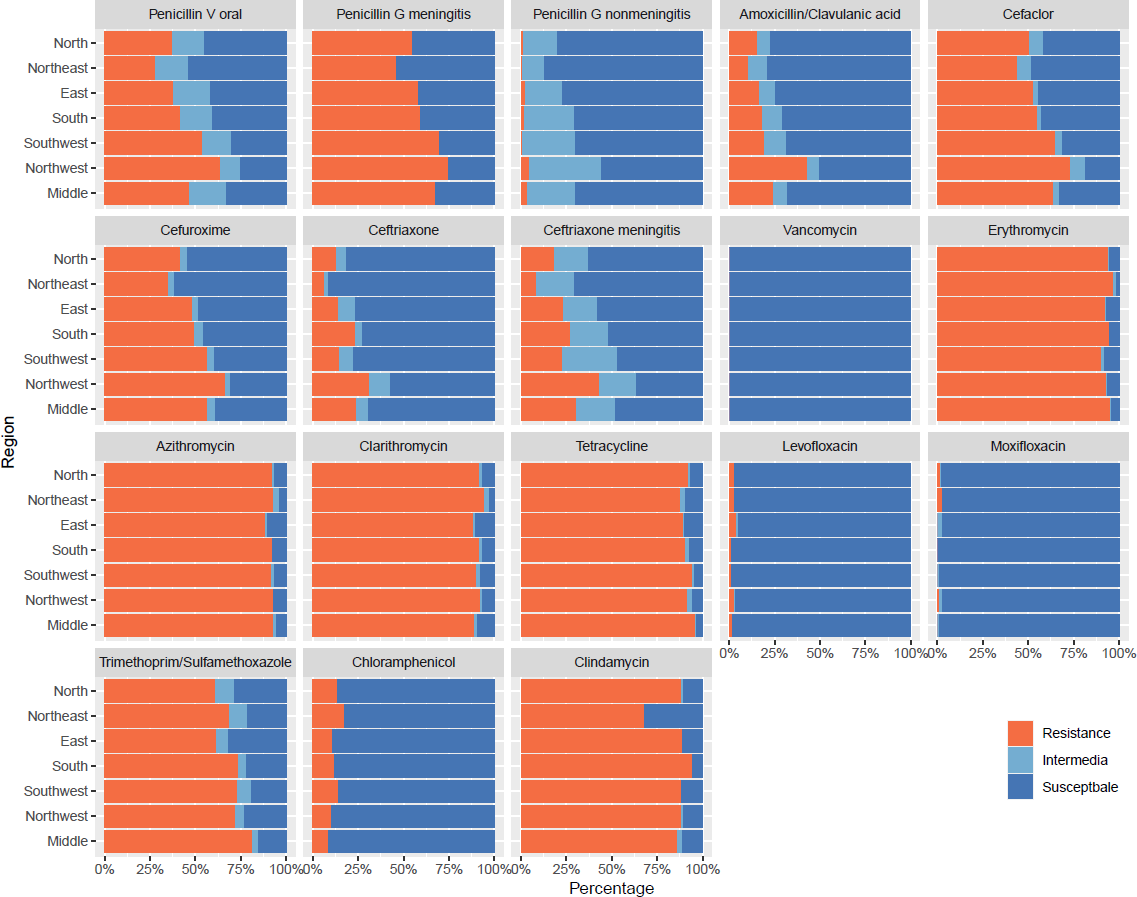


## Supplementary Figure 1. Resistance rates of *S. pneumoniae* to major antimicrobials in different regions.


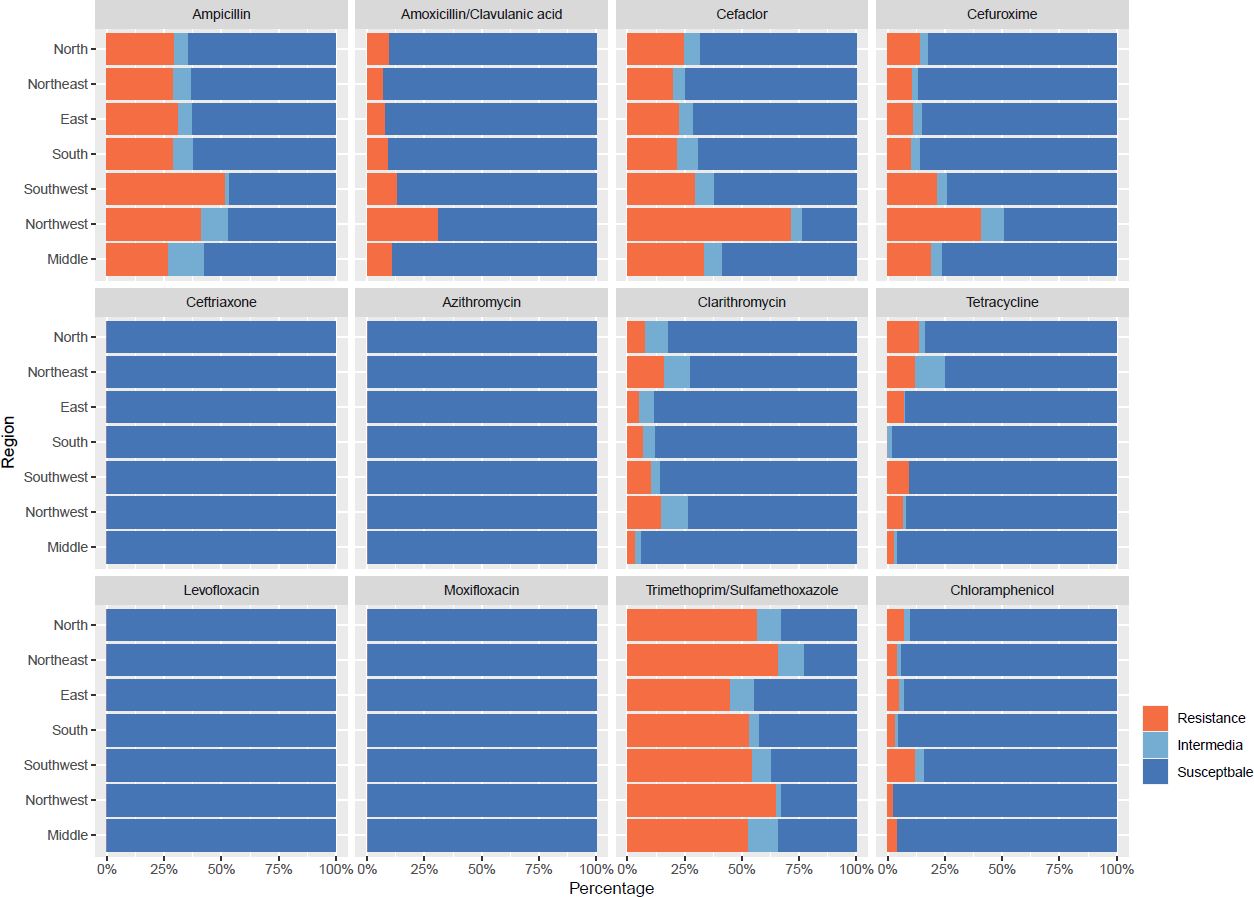


## Supplementary Figure 2. Resistance rates of *H. influenzae* to major antimicrobials in different regions.


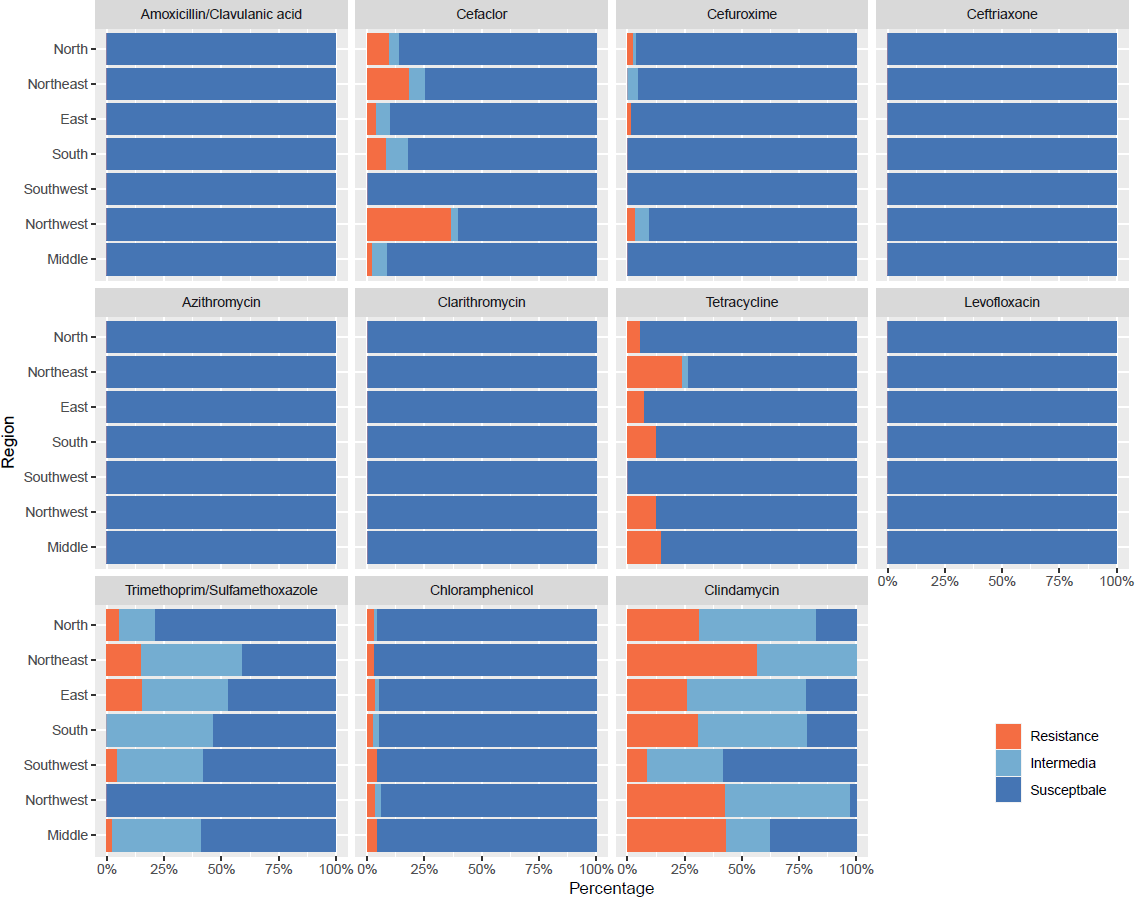


## Supplementary Figure 3. Resistance rates of *M. catarrhalis* to major antimicrobials in different regions.
